# Supplementary material for: Synthesis of poly(glycolide) in supercritical carbon dioxide in the presence of a hydrocarbon stabiliserElectronic Supplementary Information (ESI) available: Full experimental section and scheme of PGA synthesis. See http://www.rsc.org/suppdata/cc/b3/b313358c/
Source: Royal Society of Chemistry journal article supplement (doi:10.1039/b313358c), 2004-01-01
Supplement: b313358c.doc [file b313358c.doc]

# Experimental Section

## Materials

Poly(propylene glycol)-poly(ethylene glycol)-poly(propylene glycol) (PPG-PEG-PPG) (Mn=2700, Aldrich) was used as received. Triethyl amine (N(Et)3, 99%, Acros) and acetyl chloride (99%, Fischer) and butanol (99%, Acros) were dried over calcium hydride and distilled under reduced pressure. Glycolide (Purac) was recrystallised from dry ethyl acetate before use and dried under reduced pressure at 40 ºC. Tin (II) ethyl hexanoate (Sn(Oct)2, Aldrich) was dried by azeotropic distillation with dry toluene prior to use. CO2 (SFC grade, BOC) was used as received. All other solvents were from Acros and used as received.

## Equipment

Polymerisations were conducted in a 60 mL stainless steel clamp sealed autoclave equipped with a magnetically coupled overhead stirrer, as previously reported1. Heating was provided with a custom made heating jacket, whilst the temperature of the reaction was monitored with an internal thermocouple in direct contact with the reaction mixture. An overhead stirrer motor was used to provide agitation. Liquid CO2 was introduced to the vessel using a PM-101 SFE pump. GPC data were collected in HFIP at 40ºC using 2 x PL HFIP columns (Polymer Laboratories), and a PL RI detector (Polymer Laboratories Ltd.). NMR spectra were collected in CDCl3 on a Bruker DPX 300. FTIR were collected using a Perkin Elmer 2000 in KBR discs. SEM images were obtained using a Philips 505 SEM. Samples were mounted on aluminium stubs with adhesive carbon tabs and sputter coated with gold. Particle size analysis was obtained using a Malvern Mastersizer S instrument, using isopropyl alcohol as a dispersant. The number quoted as average particle size in μm is the Salter mean diameter, D3,2, also known as the surface area moment mean diameter.

End Capping of PPG-PEG-PPG with Acetyl Chloride

110 ºC, 24 hours

Toluene

PPG-PEG-PPG (15g, 0.056 mols) was placed in a 3-neck 100 mL flask equipped with a condenser and a magnetic flea. Dry toluene (3 x 20 mL batches) was added to the flask and distilled slowly out under reduced pressure to remove water. A further 30 mL of toluene was then added as a solvent. The mixture was heated to reflux under nitrogen (110 ºC, oil bath) and N(Et)3 (7.00 mLs, 0.05 mols) was syringed in. Acetyl chloride (3.9 mL, 0.05 mols) was slowly added via a syringe. A vigorous exothermic reaction was initiated, and an orange salt was precipitated. After 24 hours, the oil bath was switched off and the mixture was allowed to cool to room temperature. Methanol (30 mL) was added to destroy any remaining acetyl chloride. This mixture was then diluted with THF, filtered to remove the precipitated salt, concentrated with a rotary evaporator and dried for 24 hours under vacuum at 40 ºC. The product was then collected as a light brown oil (13.3 g, 88% yield).

**FTIR (in KBr disc)**

2869 cm-1 (CH), 1739 cm-1 (C=O), 1104 cm-1 (CO), 1373 cm-1 (CH2 wag), 1465 cm-1 (CH2 deformation).

**1H-NMR**

3.63 ppm, (CH2, PEG, 0.93, M), 3.54 ppm, (CH2, PPG, 0.51, S), 3.39 ppm (CH, PPG, 0.26, M), 2.03 ppm, (CH3, Acetyl end-groups, 0.136, S), 1.12 ppm (CH3, PPG, 0.73, M).

**Ring Opening Polymerisation of Glycolide in Supercritical CO2**

PPG-PEG-PPG,

3500 psi, 80ºC

The desired amount of stabiliser (see main text for details) together with 4 g of glycolide was added to the autoclave, which was then sealed and heated to 120 ºC, purged with dry CO2 for 1 hour, then cooled with purging to 80 oC. Our previous work with L-lactide shows that no polymerisation occurs during this step, and glycolide was expected to behave in a similar manner. Butanol (0.06 mL) and Sn(Oct)2 (0.11 mL) were then added to the cell via a syringe through the safety valve under a positive pressure of CO2 to prevent contamination from atmospheric moisture. The overhead stirrer was switched on to 300 or 50 rpm (if desired) and the cell was pressurised to 3500 psi (24 Mpa, 249 bar) with CO2. The reaction was left stirring for 24 hours, and then allowed to cool to room temperature. The CO2 was slowly vented slowly over a half hour period through the terminal tap. The cell was then opened and the product retrieved. Yields were determined gravimetrically, although it should be noted that this is difficult to determine accurately in heavily aggregated samples as product tends to aggregate on the walls of the autoclave and is difficult to remove. The microparticles formed in the presence of the stabiliser are, in contrast, free flowing and far easier to remove from the vessel. The autoclave was then cleaned by soaking overnight in a 10% aqueous solution of sodium hydrogen carbonate at 80ºC, before cooling and rinsing with a 1% aqueous solution of HCl.

## References

1 J. X. Zhang, A. J. Busby, C. J. Roberts, X. Y. Chen, M. C. Davies, S. J. B. Tendler, and S. M. Howdle*, Macromolecul*es, 2002**,** 35, 8869.
